# Supplementary material
Source: HighWire-hosted journal article supplement (https://jnm.snmjournals.org/highwire/filestream/94033/field_highwire_adjunct_files/0/60780_Supplemental_Figures.pdf)
Supplement: 60780_Supplemental_Figures.pdf [file 60780_Supplemental_Figures.pdf]

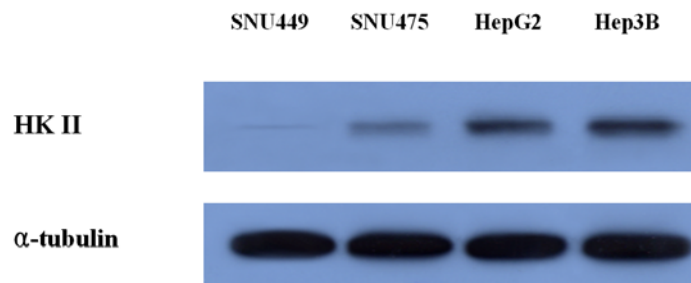

**Supplemental Figure 1.** Expression profile of HKII in various HCC cell lines. Human HCC cell line, SNU449 shows low expression of HKII on Western blot analysis.  $\alpha$ -tubulin was used as loading controls for Western blot analysis.

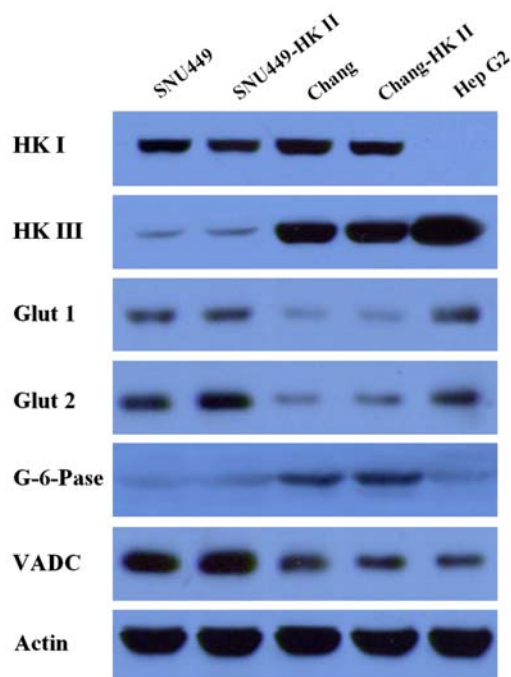

**Supplemental Figure 2.** Expression profile of isoforms of glycolytic enzymes and glucose transporters in established stable cells. There is no alteration of G6Pase, HKI and HKIII isozymes and glucose transporters in both SNU-449 and control Chang cells before and after HKII transfection. HepG2 was used as a control for each gene.

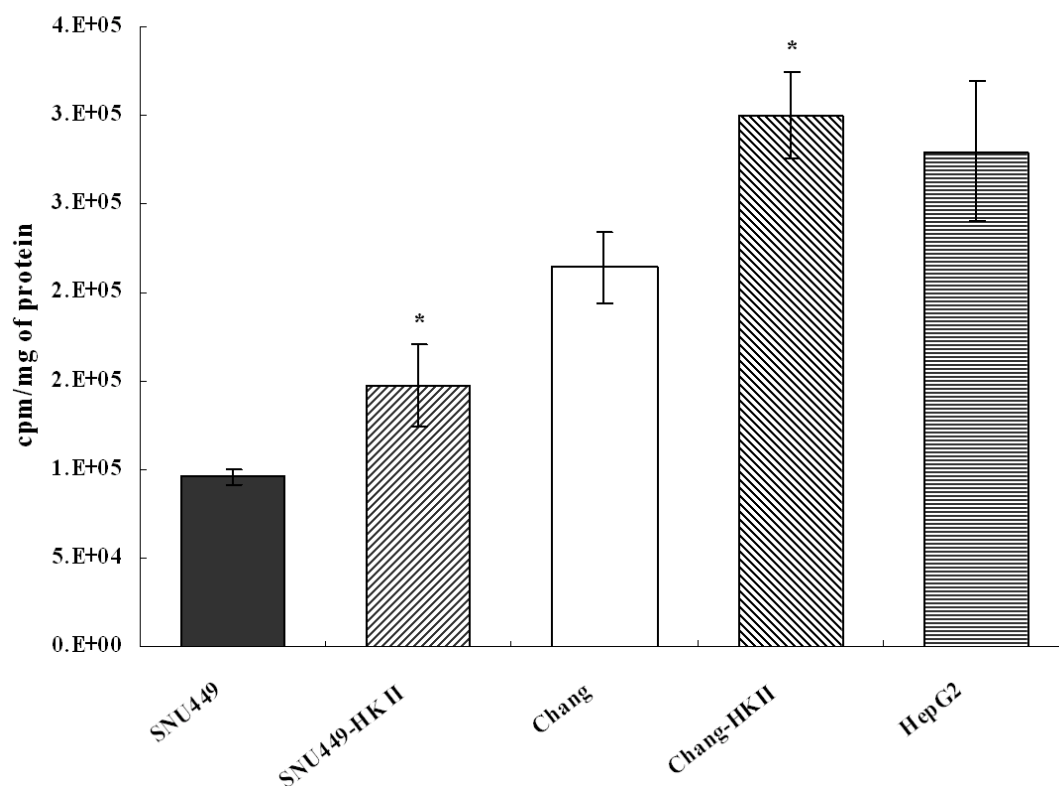

**Supplemental Figure 3.** Measurement of  $^{18}\text{F}$ -FDG uptake levels in established stable cells. Results are expressed as mean $\pm$ SD of cpm/mg protein of triplicate samples obtained from single experiment representative of 3 separate experiments.

\* $p < 0.05$ , \*\* $p < 0.01$

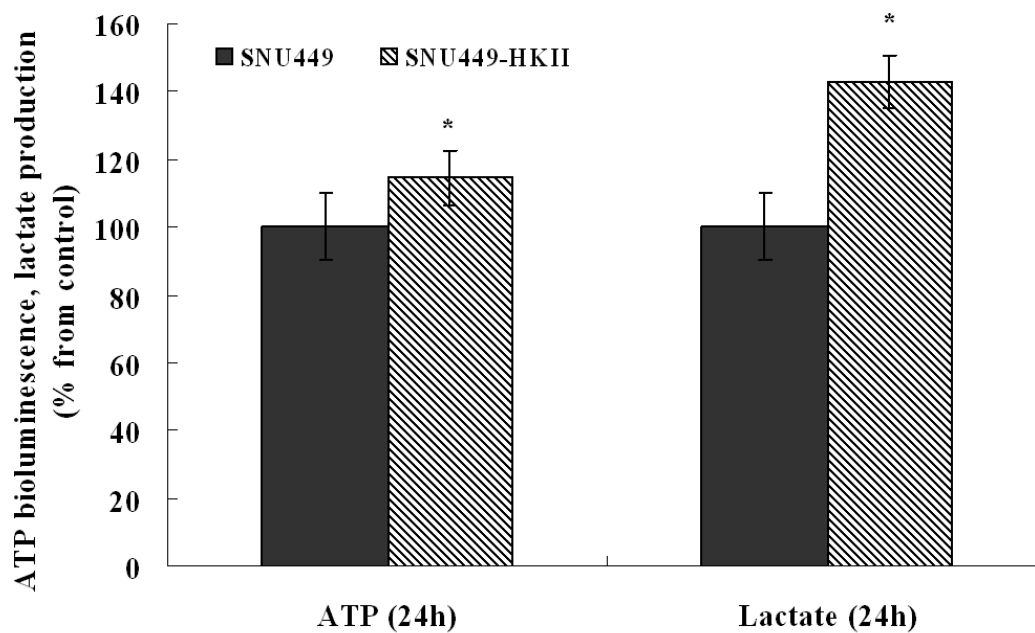

**Supplemental Figure 4.** Effects of over-expressed HKII on ATP and lactate production.

ATP and lactate production was significantly increased after HKII transfection. The results are presented as the means $\pm$ SD from 6 independent experiments (\* $p$ <0.01).

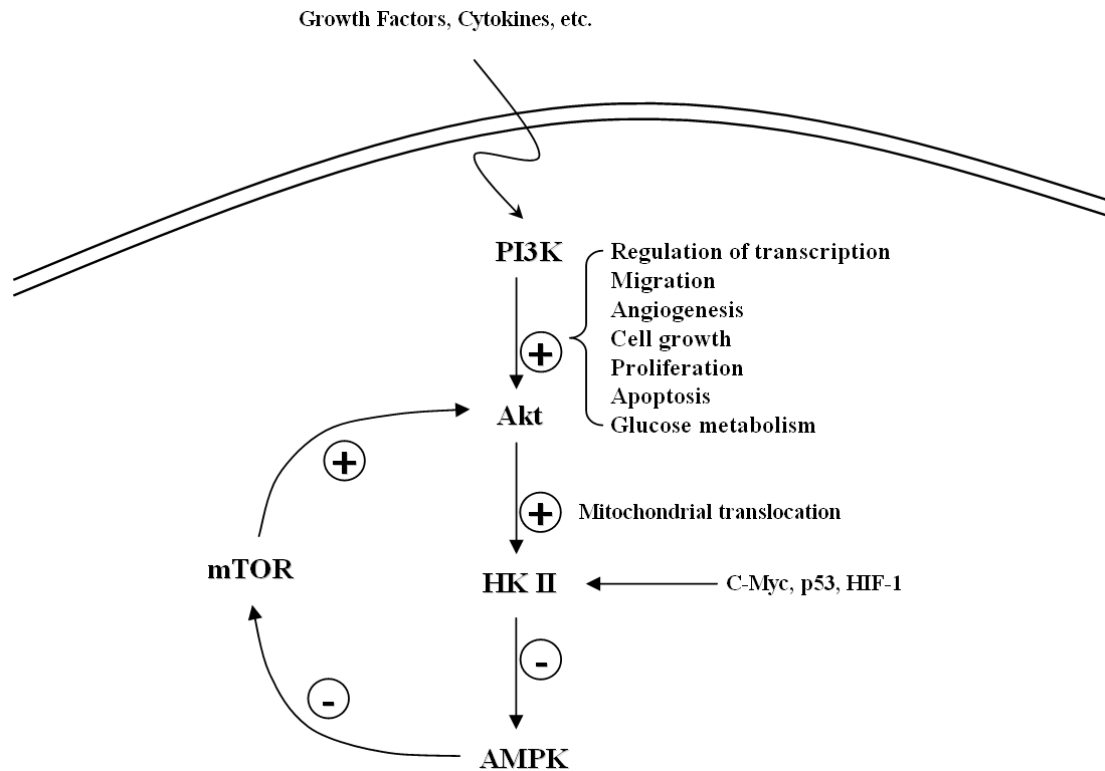

**Supplemental Figure 5.** Schematic overviews of over-expressed HKII on PI3K/Akt and AMPK pathway. Activation of Akt by growth factors and PI3K leads to translocation of HKIIs to the mitochondrial outer membrane. Mitochondrial-bound HK II is crucial for energy supply as a form of ATP. Excessive ATP production inactivates AMPK but Akt is activated through mTOR signaling. Akt and its downstream signaling pathways play important roles in tumor proliferation and progression.

+ ; Activation

- ; Inactivation
